# Supplementary figures and images for: WITHDRAWN: Development, Statistical Optimization and Evaluation of Fimasartan-loaded Solid Lipid Nanoparticles using Box Behnken Design for Oral Bioavailability Enhancement in Hypertension Management
Source: Research Square preprint supplement (doi:10.21203/rs.3.rs-7979259/v1), 2025-11-17

**Graphical abstract**


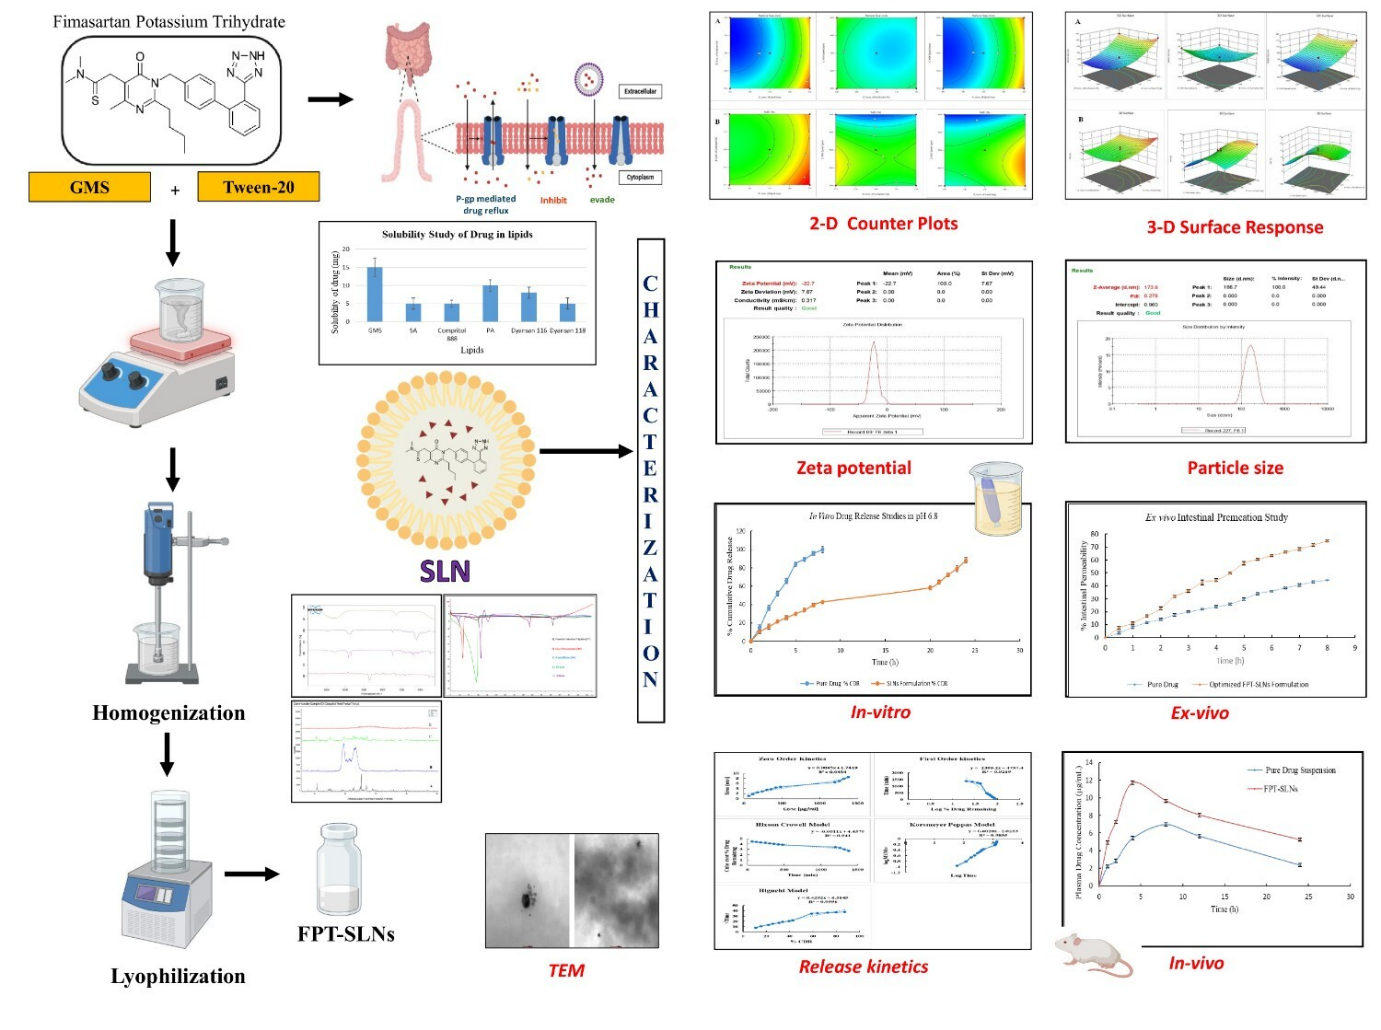

Supplement: Supplementary file 1 [file d8399b7217d19c19c967eaeb.docx]
